# Supplementary material for: Discovery and Genetic Characterization of Novel Paramyxoviruses Related to the Genus Henipavirus in Crocidura Species in the Republic of Korea
Source: MDPI journal article supplement (doi:10.3390/v13102020), 2021-10-07
Supplement: s1 [file s1]

## Supplementary Material

## Supplementary Figures

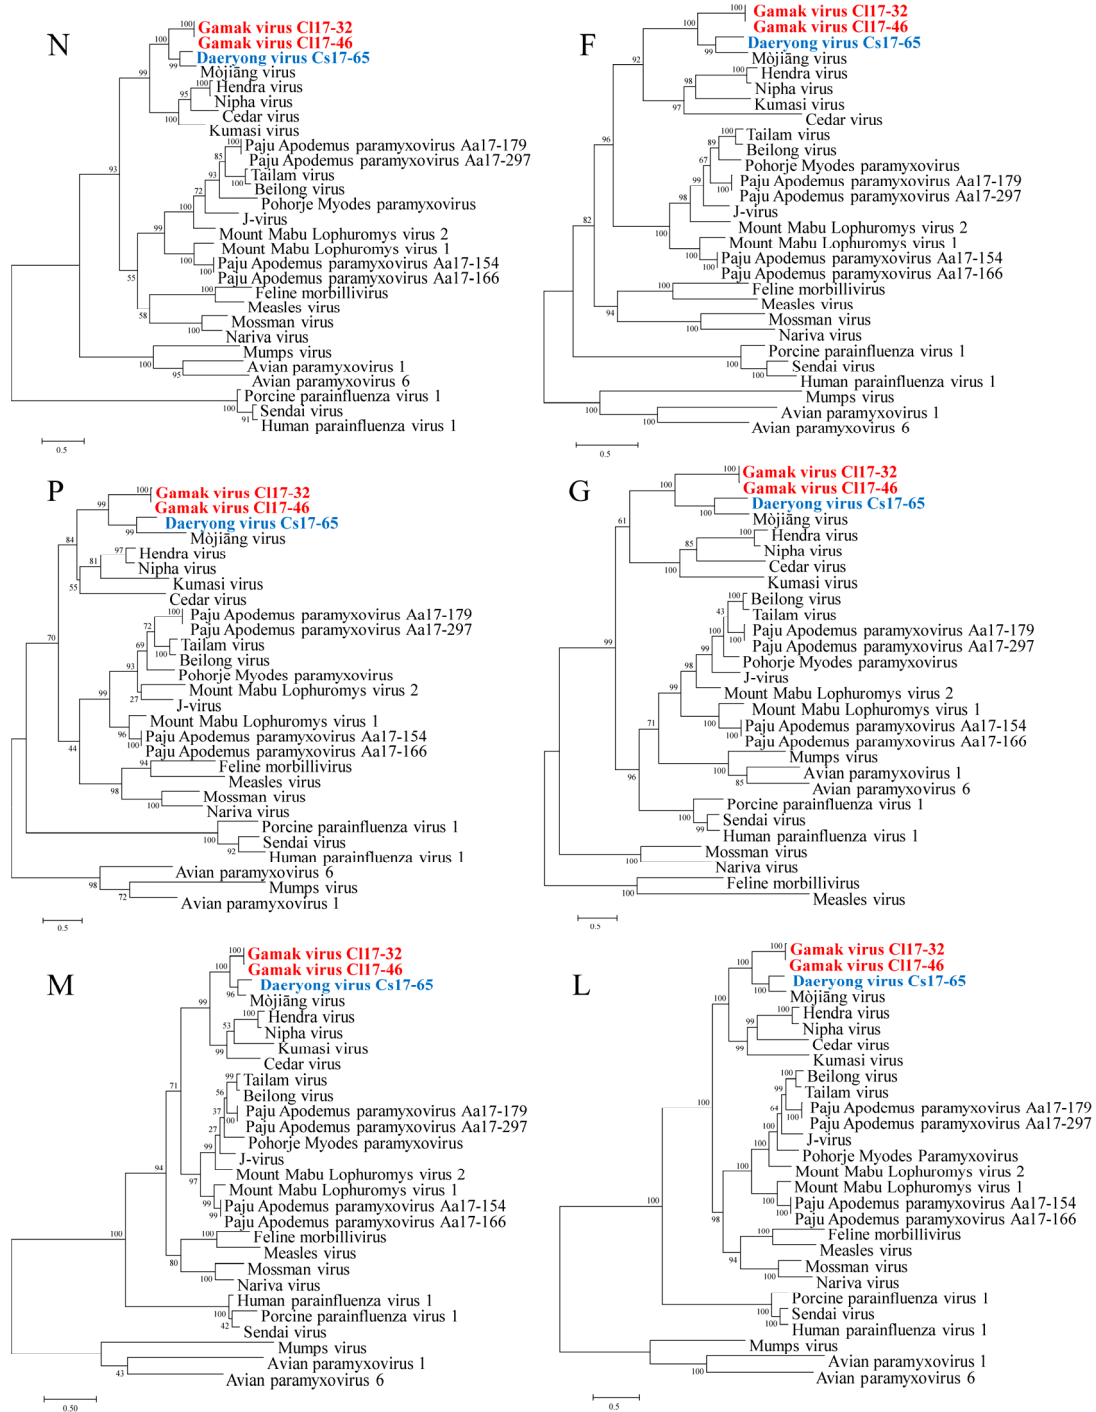

**Figure S1.** Phylogenetic trees using the coding sequences (CDSs) of *N*, *P*, *M*, *F*, *G*, and *L* genes of Gamak virus (GAKV) and Daeryong virus (DARV). The phylogenetic trees of orthoparamyxoviruses were generated using the maximum likelihood method with distribution models based on the *N*, *P*, *M*, *F*, *G*, and *L* proteins. Topologies were evaluated using a bootstrap analysis of 1,000 iterations. Multiple *Paramyxoviridae* strains were implemented as reference sequences for this phylogenetic inference. Red and blue bold texts indicate GAKV and DARV, respectively.

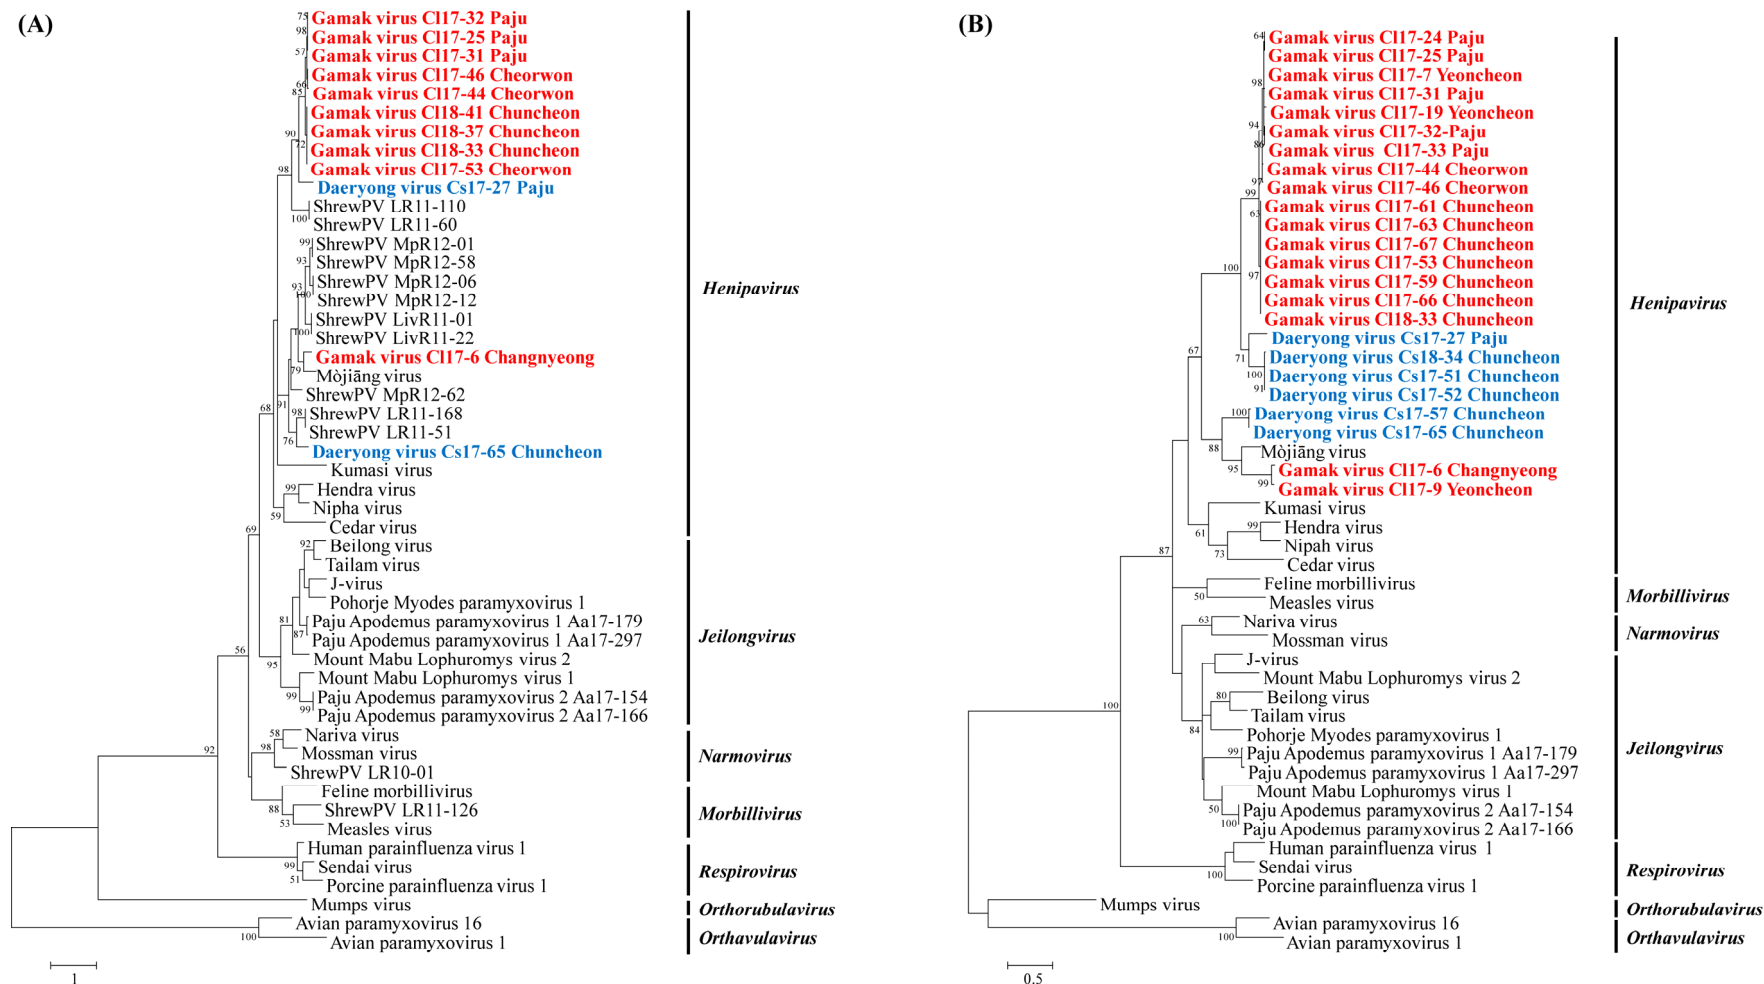

**Figure S2.** Phylogenetic analyses of the paramyxoviruses using partial genome sequences of L gene. Phylogenetic trees were generated using the maximum likelihood method via alignment of the rodent- and shrew-borne paramyxoviruses with other members of the *Paramyxovirinae* subfamily. Phylogenetic analysis of (A) 13,790–14,215 nt (426 bp) and (B) 14,849–15,311 nt (463 bp) of the L gene from *Henipavirus* with the corresponding region from other members of the *Paramyxovirinae* subfamily. Support for the topologies was assessed via bootstrapping for 1,000 iterations.

## Supplementary Tables

Table S1. Sequences of primers for quantitative reverse transcription-polymerase chain reaction.

| Genes                        | Forward (Sense, 5'–3')    | Reverse (Antisense, 5'–3') |
|------------------------------|---------------------------|----------------------------|
| <i>Human b-actin</i>         | AGAGCTACGAGCTGCCTGAC      | CGTGGATGCCACAGGACT         |
| <i>Human GAPDH</i>           | GCAAATTCCATGGCACCGT       | TCGCCCCACTTGATTTTGG        |
| <i>Ifn<math>\beta</math></i> | GTCAGAGTGGAAATCCTAAG      | ACAGCATCTGCTGGTTGAAG       |
| <i>Il-29</i>                 | CGCCTTGGAAGAGTCACTCA      | GAAGCCTCAGGTCCCAATTC       |
| <i>Isg15</i>                 | GCGAACTCATCTTTGCCAGTA     | CCAGCATCTTCACCGTCAG        |
| <i>Ifit2/Isg54</i>           | ATCCCCCATCGCTTATCTCT      | CCACCTCAATTAATCAGGCACT     |
| <i>Ifit1/Isg56</i>           | GGATTCTGTACAATACTAGAAACCA | CTTTTGGTTACTTTTCCCCTATCC   |
| <i>Rsad2/Viperin</i>         | TGCTTTTGCTTAAGGAAGCTG     | TCTACTTTGCAGAACCTCACCA     |
| <i>OAS-1</i>                 | GAAGGCAGCTCACGAAACC       | AGGCCTCAGCCTCTTGTG         |
| <i>Ddx58/Rig-I</i>           | CAGACAGATCCGAGACACTA      | TGCAAGACCTTTGGCCAGTT       |
| <i>Ifih1/Mda5</i>            | GAGGAATCAGCACGAGGAATAA    | TCAGATGGTGGGCTTTGAC        |
| <i>Il-6</i>                  | GCCCAGCTATGAACTCCTTCT     | GCGGCTACATCTTTGGAATCT      |
| GAKV RdRp                    | CAGTGCAGAACGAGCTCAAGCATA  | TGTGTACTTATTATGGTTTCGGTTGC |

**Table S2. Characteristics of *Crocidura* species infected with Gamak virus (GAKV) and Daeryong virus (DARV) and the nucleotide position of GAKV and DARV RNA obtained in this study.**

| Type of Paramyxovirus | Sample                 | Site (City/Province)      | Trapping date | Gender | Weight (g) | Vital status | Nucleotide (nt) position of Paramyxovirus RNA |
|-----------------------|------------------------|---------------------------|---------------|--------|------------|--------------|-----------------------------------------------|
| GAKV                  | Cl17-32 <sup>a,b</sup> | Paju/Gyeonggi             | Oct. 27, 2017 | Male   | 8.0        | Alive        | 1–18,460                                      |
|                       | Cl17-46 <sup>a</sup>   | Cheorwon/Gangwon          | Nov. 21, 2017 | Male   | 8.0        | Dead         | 1–18,460                                      |
|                       | Cl17-6                 | Changnyeong/Gyeongsangnam | Jun. 29, 2017 | Female | 12.5       | Dead         | 13,790–14,215; 14,849–15,311                  |
|                       | Cl17-7                 | Yeoncheon/Gyeonggi        | Sep. 28, 2017 | Male   | 8.0        | Alive        | 14,849–15,311                                 |
|                       | Cl17-9                 | Yeoncheon/Gyeonggi        | Sep. 28, 2017 | Male   | 11.0       | Dead         | 14,849–15,311                                 |
|                       | Cl17-19                | Yeoncheon/Gyeonggi        | Sep. 29, 2017 | Male   | 10.0       | Dead         | 14,849–15,311                                 |
|                       | Cl17-24                | Paju/Gyeonggi             | Oct. 19, 2017 | Male   | 9.5        | Dead         | 14,849–15,311                                 |
|                       | Cl17-25                | Paju/Gyeonggi             | Oct. 19, 2017 | Male   | 11.5       | Dead         | 13,790–14,215; 14,849–15,311                  |
|                       | Cl17-27                | Paju/Gyeonggi             | Oct. 19, 2017 | Female | 5.5        | Dead         | 13,790–14,215; 14,849–15,311                  |
|                       | Cl17-31                | Paju/Gyeonggi             | Oct. 27, 2017 | Male   | 8.5        | Dead         | 13,790–14,215; 14,849–15,311                  |
|                       | Cl17-33                | Paju/Gyeonggi             | Oct. 27, 2017 | Male   | 9.0        | Alive        | 13,790–14,215; 14,849–15,311                  |
|                       | Cl17-44                | Cheorwon/Gangwon          | Apr. 6, 2017  | Male   | 11.0       | Dead         | 13,790–14,215; 14,849–15,311                  |
|                       | Cl17-59                | Chuncheon/Gangwon         | Oct. 29, 2017 | Female | 9.5        | Dead         | 14,849–15,311                                 |
|                       | Cl17-61                | Chuncheon/Gangwon         | Oct. 30, 2017 | Male   | 10.2       | Dead         | 14,849–15,311                                 |

|      |                      |                   |               |        |      |       |                              |
|------|----------------------|-------------------|---------------|--------|------|-------|------------------------------|
|      | Cl17-63              | Chuncheon/Gangwon | Oct. 29, 2017 | Female | 8.5  | Dead  | 14,849-15,311                |
|      | Cl17-66              | Chuncheon/Gangwon | Oct. 31, 2017 | Female | 11.4 | Dead  | 14,849-15,311                |
|      | Cl17-67              | Chuncheon/Gangwon | Nov. 8, 2017  | Male   | 12.4 | Dead  | 14,849-15,311                |
|      | Cl18-33              | Chuncheon/Gangwon | Nov. 13, 2018 | Male   | 10.5 | Dead  | 13,790-14,215; 14,849-15,311 |
|      | Cl18-37              | Chuncheon/Gangwon | Nov. 13, 2018 | Male   | 7.0  | Dead  | 13,790-14,215; 14,849-15,311 |
|      | Cl18-41              | Chuncheon/Gangwon | Nov. 14, 2018 | Male   | 7.5  | Alive | 13,790-14,215                |
| DARV | Cs17-65 <sup>a</sup> | Chuncheon/Gangwon | Oct. 31, 2017 | Female | 5.1  | Dead  | 1–19,475                     |
|      | Cs17-51              | Chuncheon/Gangwon | Sep. 28, 2017 | Male   | 36.5 | Dead  | 14,849-15,311                |
|      | Cs17-52              | Chuncheon/Gangwon | Oct. 11, 2016 | Female | 44.5 | Dead  | 14,849-15,311                |
|      | Cs17-53              | Chuncheon/Gangwon | Apr. 18, 2017 | Male   | 26.0 | Dead  | 13,790-14,215                |
|      | Cs17-57              | Chuncheon/Gangwon | Apr. 18, 2017 | Female | 28.0 | Dead  | 14,849-15,311                |
|      | Cs18-34              | Chuncheon/Gangwon | Oct. 16, 2018 | Female | 32.0 | Dead  | 14,849-15,311                |

<sup>a</sup>: Whole genome sequences were completely obtained.

<sup>b</sup>: Cell culture-based isolates.

**Table S3. Molecular prevalence of Gamak virus (GAKV) by region, sex, weight, and season in *C. lasiura*, the Republic of Korea from 2017 to 2018.**

| Category             | Number of<br><i>C. lasiura</i> | RNA positivity of<br>GAKV (%) <sup>*</sup> |
|----------------------|--------------------------------|--------------------------------------------|
| <b>Region (n=94)</b> |                                |                                            |
| Gangwon              | 40                             | 11/40 (27.5%)                              |
| Gyeonggi             | 52                             | 9/52 (17.3%)                               |
| Gyeongsangnam        | 2                              | 1/2 (50.0%)                                |
| <b>Sex (n=94)</b>    |                                |                                            |
| Males                | 58                             | 16/58 (27.6%)                              |
| Females              | 36                             | 5/36 (13.9%)                               |
| <b>Weight (n=94)</b> |                                |                                            |
| <10g (Subadults)     | 54                             | 11/54 (20.4%)                              |
| 10–20g (Adults)      | 40                             | 10/40 (25.0%)                              |
| <b>Season (n=94)</b> |                                |                                            |
| Spring (Mar.–May)    | 9                              | 1/9 (11.1%)                                |
| Summer (Jun.–Aug.)   | 2                              | 1/2 (50.0%)                                |
| Autumn (Sep.–Nov.)   | 79                             | 19/79 (24.1%)                              |
| Winter (Dec.–Feb.)   | 4                              | 0/4                                        |
| <b>Total</b>         | <b>94</b>                      | <b>21/94 (22.3%)</b>                       |

<sup>\*</sup>The positive rate of GAKV RNA indicates the detection of the partial L gene (targeting pan-*Orthoparamyxovirinae* and the genera *Respirovirus*, *Morbillivirus*, and *Henipavirus*) using RT-PCR and Sanger sequencing.

Table S4. Molecular prevalence of Daeryong virus (DARV) by region, sex, weight, and season in *C. shantungensis*, the Republic of Korea from 2017 to 2018.

| Category             | Number of<br><i>C. shantungensis</i> | RNA positivity of<br>DARV (%)* |
|----------------------|--------------------------------------|--------------------------------|
| <b>Region (n=21)</b> |                                      |                                |
| Gangwon              | 10                                   | 5/10 (50.0%)                   |
| Gyeonggi             | 11                                   | 0/11                           |
| Gyeongsangnam        | 0                                    | 0/0                            |
| <b>Sex (n=21)</b>    |                                      |                                |
| Males                | 9                                    | 1/9 (11.1%)                    |
| Females              | 12                                   | 4/12 (33.3%)                   |
| <b>Weight (n=21)</b> |                                      |                                |
| <5g (Subadults)      | 14                                   | 3/14 (21.4%)                   |
| 5–9g (Adults)        | 5                                    | 2/7 (28.6%)                    |
| <b>Season (n=21)</b> |                                      |                                |
| Spring (Mar.–May)    | 2                                    | 0/2                            |
| Summer (Jun.–Aug.)   | 0                                    | 0/0                            |
| Autumn (Sep.–Nov.)   | 19                                   | 5/19 (26.3%)                   |
| Winter (Dec.–Feb.)   | 0                                    | 0/0                            |
| <b>Total</b>         | <b>21</b>                            | <b>5/21 (23.8%)</b>            |

\*The positive rate of DARV RNA indicates the detection of the partial L gene (targeting pan-*Orthoparamyxovirinae* and the genera *Respirovirus*, *Morbillivirus*, and *Henipavirus*) using RT-PCR and Sanger sequencing.



**Table S5. Genome coverage of consensus sequences for Gamak virus using next-generation sequencing (SISPA-based MiSeq) method.**

| NGS method           | Origin | Strains              | Total reads | Read mapped to<br>reference/Total reads (%) | Crocidura paramyxoviruses   |                    |
|----------------------|--------|----------------------|-------------|---------------------------------------------|-----------------------------|--------------------|
|                      |        |                      |             |                                             | Read mapped to<br>reference | Depth of coverage* |
| SISPA-based<br>MiSeq | Kidney | Cl17-46 <sup>a</sup> | 245,846     | 1.468                                       | 3,608                       | 28.703             |

\*Depth of coverage was calculated using the number of mapped reads [(average read length × number of reads that matched the reference)/(reference genome size)].

<sup>a</sup>: Gamak virus 18,460 nt

SISPA: sequence-independent, single-primer amplification

**Table S6. Genome coverage of consensus sequences for Gamak and Daeryong viruses using next-generation sequencing (RNA-Seq based HiSeq) method.**

| NGS method             | Origin | Strains              | Total reads | Read mapped to<br>reference/Total reads (%) | Crocidura paramyxoviruses   |                    |
|------------------------|--------|----------------------|-------------|---------------------------------------------|-----------------------------|--------------------|
|                        |        |                      |             |                                             | Read mapped to<br>reference | Depth of coverage* |
| RNA-Seq<br>based HiSeq | Vp     | Cl17-32 <sup>a</sup> | 83,500,574  | 17.699                                      | 14,779,024                  | 80665.238          |
|                        | Kidney | Cl17-46 <sup>a</sup> | 72,742,132  | 0.009                                       | 6,497                       | 35.356             |
|                        |        | Cs17-65 <sup>b</sup> | 83,682,946  | 0.061                                       | 50,987                      | 278.016            |
| Total                  |        |                      | 239,925,652 | 6.184                                       | 14,836,508                  | 80,978.61          |

\*Depth of coverage was calculated using the number of mapped reads [(read length × number of reads that matched the reference)/(reference genome size)].

Vp: Cell culture-based isolates

<sup>a</sup>: Gamak virus 18,460 nt

<sup>b</sup>: Daeryong virus 19,475 nt

**Table S7. Sequences of intergenic regions (IGRs) and transcriptional stop and start signals of Gamak virus.**

| Genes                  | Gene stop  | IGR | Gene Start |
|------------------------|------------|-----|------------|
| /N                     |            | CTT | AAGAATCAAA |
| N/P                    | TTAAGAAAAA | CTT | AAGAATCAAA |
| P/M                    | TTAAGAAAAA | CTT | AAGAGTCAAA |
| M/F                    | TTAGAAAAAA | CTT | AAGAATCAAA |
| F/G                    | TTAAGAAAAA | CTT | AAGAATCAAA |
| G/L                    | TTAAGAAAAA | CTT | AAGAATCAAA |
| L/                     | TTAAGAAAAA | CTT |            |
| Consensus<br>sequences | TTARRAAAAA | CTT | AAGARTCAAA |

**Table S8. Sequences of intergenic regions (IGRs) and transcriptional stop and start signals of Daeryong virus.**

| Genes                  | Gene stop  | IGR | Gene Start |
|------------------------|------------|-----|------------|
| /N                     |            | CTT | AGGACTCAGG |
| N/P                    | TTATAAAAAA | CTT | AGGATGCAAG |
| P/M                    | TTAAGAAAAA | CTT | AGGGGTAAAG |
| M/F                    | TTAAAGAAAA | CTT | AGGACGTCAA |
| F/G                    | TTATAAAAAA | CTT | AGGGGTCAAG |
| G/L                    | TTAAGAAAAA | CTT | AGGTGCAATG |
| L/                     | ATATAAAAAA | CTT |            |
| Consensus<br>sequences | WTAWRRAAAA | CTT | AGGDBBHMDR |

**Table S9. Amino acid similarities of GAKV and DARV with other viruses in *Paramyxoviridae*.**

| Genus                   | Virus       | GAKV      |           |           |           |           |           | DARV      |           |           |           |           |           |
|-------------------------|-------------|-----------|-----------|-----------|-----------|-----------|-----------|-----------|-----------|-----------|-----------|-----------|-----------|
|                         |             | N         | P         | M         | F         | G         | L         | N         | P         | M         | F         | G         | L         |
| <i>Henipavirus</i>      | <b>GAKV</b> | 98.7      | 96.3      | 99.4      | 99.1      | 99.4      | 98.5      | 57.9-60.1 | 30.7-31.3 | 76.8      | 57.5-57.7 | 28.8-28.9 | 62.9      |
|                         | <b>DARV</b> | 57.9-60.1 | 30.7-31.3 | 76.8      | 57.5-57.7 | 28.8-28.9 | 62.9      | -         | -         | -         | -         | -         | -         |
|                         | HeV         | 47.0-48.1 | 22.7-23.0 | 60.1-60.4 | 39.7      | 17.4      | 52.0-52.1 | 46.4      | 22.0      | 59.5      | 39.0      | 18.4      | 51.9      |
|                         | NiV         | 47.7-48.7 | 23.9-24.2 | 59.5-59.8 | 40.3      | 17.8      | 52.4      | 46.6      | 18.7      | 59.3      | 39.9      | 18.3      | 52.2      |
|                         | MojV        | 58.4-58.6 | 27.4-29.0 | 80.3-80.6 | 56.9-57.1 | 29.9      | 62.3-62.4 | 69.6      | 36.0      | 83.1      | 67.3      | 49.3      | 74.1      |
|                         | CedV        | 45.7      | 19.1-19.4 | 57.5      | 33.4      | 16.9      | 49.4-49.5 | 45.7      | 19.0      | 57.8      | 34.1      | 17.3      | 49.8      |
|                         | KV          | 46.1      | 25.6-25.7 | 56.9      | 38.3      | 16.3      | 49.0-49.3 | 46.1      | 19.3      | 58.9      | 39.2      | 18.3      | 49.2      |
| <i>Jeilongvirus</i>     | PAPV-1      | 34.7-35.4 | 18.3      | 55.3      | 37.9-38.4 | 18.6      | 49.6      | 36.4      | 20.4-21.4 | 53.5      | 36.8-37.0 | 19.9      | 49.0-49.2 |
|                         | PAPV-2      | 33.3-34.6 | 21.4-22.9 | 57.2-57.4 | 35.5-35.7 | 17.1-17.3 | 49.7      | 34.9-35.8 | 20.0      | 56.0-56.2 | 35.8-35.9 | 17.8      | 50.7-50.8 |
|                         | TaiV        | 34.7-34.9 | 19.4-19.6 | 53.5      | 37.5-37.7 | 18.4      | 48.7-48.8 | 36.6      | 17.3      | 53.2      | 35.5      | 18.6      | 49.5      |
|                         | BeiV        | 34.7-35.4 | 18.5-19.4 | 55.0      | 38.4-38.6 | 18.6      | 48.7-48.8 | 36.2      | 14.3      | 54.1      | 35.3      | 19.2      | 49.0      |
|                         | JV          | 33.7      | 18.6-18.8 | 52.9      | 37.3-37.5 | 17.9      | 48.6-48.8 | 36.0      | 20.4      | 52.6      | 36.2      | 20.5      | 48.7      |
|                         | MMLV-1      | 35.6-36.0 | 22.1-22.5 | 56.0      | 34.8-35.0 | 20.3-20.6 | 49.1-49.3 | 35.3      | 18.4      | 57.5      | 36.8      | 18.4      | 49.9      |
|                         | MMLV-2      | 33.9      | 20.9-22.5 | 57.1-57.4 | 38.3      | 19.7      | 50.3-50.4 | 36.2      | 19.5      | 53.8      | 37.2      | 17.8      | 50.5      |
| <i>Morbillivirsu</i>    | PMPV-1      | 34.8-35.0 | 21.6-22.8 | 54.7      | 36.0      | 19.7      | 49.2-49.3 | 35.0      | 18.5      | 52.9      | 35.1      | 19.1      | 50.5      |
|                         | FeMV        | 31.8      | 17.7-17.9 | 45.4      | 32.2      | 12.4      | 45.2-45.3 | 32.2      | 18.5      | 46.0      | 32.8      | 9.7       | 45.7      |
| <i>Narmovirus</i>       | MV          | 31.2-31.6 | 16.8-17.4 | 46.0      | 31.8      | 12.3      | 46.9-47.1 | 32.4      | 18.1      | 46.6      | 32.1      | 10.9      | 46.7      |
|                         | MossV       | 34.8-35.2 | 12.7-14.6 | 48.2      | 29.9      | 13.8      | 47.4-47.5 | 36.2      | 19.2      | 48.2      | 32.6      | 13.5      | 48.1      |
| <i>Respirovirus</i>     | NarV        | 36.2-36.4 | 14.7-15.7 | 49.4      | 29.0      | 14.0-14.2 | 46.3-46.4 | 36.4      | 16.7      | 49.1      | 30.6      | 12.9      | 46.3      |
|                         | PPIV-1      | 20.0      | 11.1-11.5 | 34.3      | 25.9      | 19.1      | 37.5-37.9 | 18.3      | 7.8       | 34.7      | 26.9      | 18.6      | 39.6      |
| <i>Orthorubulavirus</i> | SenV        | 19.5      | 12.0-12.3 | 34.6      | 26.4-26.5 | 18.4-18.6 | 36.7-37.4 | 20.6      | 9.7       | 34.4      | 27.5      | 19.8      | 38.6      |
|                         | HPIV-1      | 19.5-19.8 | 11.4-12.7 | 35.8      | 25.8-25.9 | 18.3      | 36.8-37.3 | 20.0      | 13.6      | 33.5      | 26.2      | 18.1      | 39.5      |
| <i>Orthoavulavirus</i>  | MuV         | 24.5      | 9.4-12.1  | 17.9      | 25.8-25.9 | 13.4      | 27.2-27.3 | 25.7      | 10.3      | 17.6      | 25.1      | 13.1      | 26.3      |
| <i>Metaavulavirus</i>   | APMV-1      | 27.4-27.6 | 17.5      | 19.6      | 24.6-24.8 | 15.3      | 24.9      | 25.3      | 17.7      | 19.4      | 26.9      | 13.5      | 26.0      |
|                         | APMV-6      | 26.7-27.1 | 13.0-14.0 | 22.3      | 25.2      | 15.5      | 25.8-26.8 | 27.5      | 10.2      | 22.5      | 28.2      | 15.2      | 26.7      |

Similarities are indicated per protein and are expressed as percentages. GAKV, Gamak virus; DARV, Daeryong virus; HeV, Hendra virus; NiV, Nipah virus; MojV, Mòjiāng virus; CedV, Cedar virus; KV, Kumasi virus; PAPV-1, Paju Apodemus paramyxovirus 1; PAPV-2, Paju Apodemus paramyxovirus 2; TaiV, Tailam virus; BeiV, Beilong virus; JV, J-virus; MMLV-1, Mount Mabu Lophuromys virus 1; MMLV-2, Mount Mabu Lophuromys virus 2; PMPV-1, Pohorje Myodes paramyxovirus 1; FeMV, Feline morbillivirus; MeV, Measles virus; PPIV-1, Porcine parainfluenza virus 1; SenV, Sendai virus; HPIV-1, Human parainfluenza virus 1; MuV, Mumps virus; APMV-1, Avian paramyxovirus 1; APMV-6, Avian paramyxovirus 6.
